# Supplementary material for: Coordination site-dependent cation binding and multi-responsible redox properties of Janus-head metalloligand, [MoV(1,2-mercaptophenolato)3]
Source: Royal Society of Chemistry journal article supplement (doi:10.1039/c2dt30178d), 2012-01-01
Supplement: c2dt30178d.pdf [file c2dt30178d.pdf]

## Supporting Information of

# Coordination site-Dependent Cation Binding and Multi-responsible Redox Properties of Janus-Head Metalloligand, $[\text{Mo}^{\text{V}}(1,2\text{-mercaptophenolato})_3]^-$

Takeshi Matsumoto,<sup>b</sup> Masanori Wakizaka,<sup>a</sup> Hirokazu Yano,<sup>a</sup> Atsushi Kobayashi,<sup>a</sup> Ho-Chol Chang,<sup>\*a</sup> and Masako Kato<sup>\*a,b</sup>

<sup>a</sup> *Division of Chemistry, Faculty of Science, Hokkaido University, North-10, West-8, Kita-ku, Sapporo 060-0810, Japan. Fax: +81-11-706-3447; Tel: +81-11-706-3817; E-mail: mkato@sci.hokudai.ac.jp.*

<sup>b</sup> *Center for Strategic Utilization of Elements, Faculty of Science, Hokkaido University, North-10, West-8, Kita-ku, Sapporo 060-0810, Japan.*

## Contents.

1. Synthetic procedures of Fe<sup>II</sup>-, Co<sup>II</sup>-, and Ni<sup>II</sup>-powder samples, and **4**·1.5CH<sub>2</sub>Cl<sub>2</sub>.
2. **Table 1S**. Crystallographic data for **4**·1.5CH<sub>2</sub>Cl<sub>2</sub>.
3. **Figure 1S**. Crystal structure of **4**·1.5CH<sub>2</sub>Cl<sub>2</sub>.
4. **Chart 1S**. Definitions of OCT/TP(%) criteria.
5. **Table 2S**. Octahedral/trigonal-prismatic parameters (OCT/TP (%)) around [Mo<sup>V</sup>(mp)<sub>3</sub>]<sup>+</sup>.
6. **Table 3S**. Ligand bending angles ( $\eta$ ) in mp<sup>2-</sup>.
7. **Table 4S**. Bond distances (Å) in mp<sup>2-</sup>.
8. **Table 5S**. Mo–O and Mo–S bond distances (Å) of **4**·1.5CH<sub>2</sub>Cl<sub>2</sub>.
9. **Figure 2S**. Solid state UV-vis-NIR spectra of Mn<sup>II</sup>-, Fe<sup>II</sup>-, Co<sup>II</sup>-, and Ni<sup>II</sup>-powder samples.
10. **Figure 3S**. IR spectra of Mn<sup>II</sup>-, Fe<sup>II</sup>-, Co<sup>II</sup>-, and Ni<sup>II</sup>-powder samples.
11. **Figure 4S**. Intramolecular (A) and intermolecular  $\pi$ – $\pi$  interaction (B) in **3**·1.5CH<sub>2</sub>Cl<sub>2</sub>.
12. **Figure 5S**. Crystal packing of **5**.
13. **Table 6S**. UV-Vis-NIR spectroscopic data of **1-3** and **5** in solution and in the solid states.
14. **Figure 6S**. Differential spectra of  $\Delta\{\epsilon(1)-\epsilon(2)\}$  and  $\Delta\{\epsilon(3)-2\times\epsilon(2)\}$  in CH<sub>3</sub>CN and *o*-Cl<sub>2</sub>C<sub>6</sub>H<sub>4</sub> solution.
15. **Figure 7S**. CVs and DPVs of **2** ( $1 \times 10^{-3}$  M) in CH<sub>3</sub>CN with 0.05 M TBAP, *o*-Cl<sub>2</sub>C<sub>6</sub>H<sub>4</sub> with 0.05 M TBAP, and *o*-Cl<sub>2</sub>C<sub>6</sub>H<sub>4</sub> with 0.05 M TBAPFB.
16. **Figure 8S**. CVs and DPVs of **1** ( $1 \times 10^{-3}$  M) in CH<sub>3</sub>CN with 0.05 M TBAP, *o*-Cl<sub>2</sub>C<sub>6</sub>H<sub>4</sub> with 0.05 M TBAP, and *o*-Cl<sub>2</sub>C<sub>6</sub>H<sub>4</sub> with 0.05 M TBAPFB.
17. **Figure 9S**. CVs and DPVs of **3** ( $1 \times 10^{-3}$  M) in CH<sub>3</sub>CN with 0.05 M TBAP, *o*-Cl<sub>2</sub>C<sub>6</sub>H<sub>4</sub> with 0.05 M TBAP, and in *o*-Cl<sub>2</sub>C<sub>6</sub>H<sub>4</sub> with TBAPFB.
18. **Figure 10S**. CV of Mn<sup>II</sup>(H<sub>2</sub>O)<sub>6</sub>(ClO<sub>4</sub>)<sub>2</sub> in CH<sub>3</sub>CN with 0.1 M TBAPF<sub>6</sub>.
19. **Scheme 1S**. Plausible mechanisms of electrochemically irreversible reactions of **3** in CH<sub>3</sub>CN solution.

20. **Figure 11S.** UV-vis-NIR spectra, CVs, and DPVs of **1-3** in *o*-Cl<sub>2</sub>C<sub>6</sub>H<sub>4</sub> solution containing 0.05 M TBAP.

21. **Table 7S.** Redox potentials of **1**, **2**, and **3** in CH<sub>3</sub>CN solution containing 0.05 M TBAFB.

**Synthesis of Fe<sup>II</sup>-powder sample.** A dark brown MeOH (0.7 mL) solution of **1** (25 mg, 0.039 mmol) was added to a pink MeOH (0.3 mL) solution of Fe<sup>II</sup>Cl<sub>2</sub>·4H<sub>2</sub>O (15.5 mg, 0.078 mmol). After stirring for 1 hour, a reddish-brown precipitate was obtained. This was filtered, and washed with H<sub>2</sub>O (0.5 mL × 2) and MeOH (0.3 mL × 2). The resulting reddish-brown powder was dried in vacuo and used for UV-vis-NIR measurements as Fe<sup>II</sup>-powder sample.

**Synthesis of {Co<sup>II</sup>(H<sub>2</sub>O)(MeOH)[*fac*-Mo<sup>V</sup>(mp)<sub>3</sub>]<sub>2</sub>}·1.5CH<sub>2</sub>Cl<sub>2</sub> (**4**·1.5CH<sub>2</sub>Cl<sub>2</sub>).** A dark brown MeOH (5 mL) solution of **1** (200 mg, 0.315 mmol) was added to a pink MeOH (1 mL) solution of Co<sup>II</sup>Cl<sub>2</sub>·4H<sub>2</sub>O (125 mg, 0.632 mmol). After stirring for 1 hour, a reddish-brown precipitate was obtained. This was filtered, and washed with H<sub>2</sub>O (3 mL × 2) and MeOH (1 mL × 2). The resulting reddish-brown powder was dried in vacuo and used for UV-vis-NIR measurements as Co<sup>II</sup>-powder sample. For synthesis of crystal sample suitable for X-ray crystallographic analysis, this powder sample was dissolved in CH<sub>2</sub>Cl<sub>2</sub> (20 mL), then *n*-hexane (20 mL) was layered onto this solution. After storage of this solution for 5 days at room temperature, reddish-brown crystals were obtained. After filtration and washing with *n*-hexane (2 mL × 3), followed by drying in vacuo, complex **4**·1.5CH<sub>2</sub>Cl<sub>2</sub> was isolated as reddish-brown crystals in 10% yield. Anal. Found: C, 39.21; H, 2.86. Calc. for C<sub>38.5</sub>H<sub>33</sub>Cl<sub>3</sub>CoMoO<sub>8</sub>S<sub>6</sub> (**4**·1.5CH<sub>2</sub>Cl<sub>2</sub>): C, 39.41; H, 2.86%.  $\chi_M T_{300K} = 4.515$  emu·K·mol<sup>-1</sup>.

**Synthesis of Ni<sup>II</sup>-powder sample.** A dark brown MeOH (0.7 mL) solution of **1** (25 mg, 0.039 mmol) was added to a pink MeOH (0.3 mL) solution of Ni<sup>II</sup>Cl<sub>2</sub>·4H<sub>2</sub>O (18.5 mg, 0.078 mmol). After stirring for 1 hour, a reddish-brown precipitate was obtained. This was filtered, and washed with H<sub>2</sub>O (0.5 mL × 2) and MeOH (0.3 mL × 2). The resulting reddish-brown powder was dried in vacuo and used for UV-vis-NIR measurements as Ni<sup>II</sup>-powder sample.

**Table 1S.** Crystallographic data for **4**·1.5CH<sub>2</sub>Cl<sub>2</sub>.

|                                                       | <b>4</b> ·1.5CH <sub>2</sub> Cl <sub>2</sub>                                                      |
|-------------------------------------------------------|---------------------------------------------------------------------------------------------------|
| formula                                               | C <sub>38.5</sub> H <sub>33</sub> Cl <sub>3</sub> CoMo <sub>2</sub> O <sub>8</sub> S <sub>6</sub> |
| fw                                                    | 1173.21                                                                                           |
| crystal size (mm <sup>3</sup> )                       | 0.05× 0.05× 0.05                                                                                  |
| crystal system                                        | triclinic                                                                                         |
| space group                                           | <i>P</i> -1(No. 2)                                                                                |
| <i>a</i> (Å)                                          | 11.356(2)                                                                                         |
| <i>b</i> (Å)                                          | 13.024(2)                                                                                         |
| <i>c</i> (Å)                                          | 14.982(3)                                                                                         |
| $\alpha(^{\circ})$                                    | 96.542(3)                                                                                         |
| $\beta(^{\circ})$                                     | 106.062(3)                                                                                        |
| $\gamma(^{\circ})$                                    | 95.802(3)                                                                                         |
| <i>V</i> (Å <sup>3</sup> )                            | 2095.0(6)                                                                                         |
| <i>T</i> (K)                                          | 163                                                                                               |
| <i>Z</i>                                              | 2                                                                                                 |
| <i>D</i> <sub>calc</sub> (g cm <sup>-3</sup> )        | 1.860                                                                                             |
| <i>F</i> (000)                                        | 1172                                                                                              |
| $\mu$ (Mo K $\alpha$ )(cm <sup>-1</sup> )             | 15.223                                                                                            |
| measured reflns.                                      | 14583                                                                                             |
| unique reflns.                                        | 9140                                                                                              |
| refined parameters                                    | 533                                                                                               |
| GOF on <i>F</i> <sup>2</sup>                          | 1.014                                                                                             |
| <i>R</i> <sub>int</sub>                               | 0.025                                                                                             |
| <i>R</i> <sub>1</sub> <sup><i>a</i></sup>             | 0.0534                                                                                            |
| <i>wR</i> <sub>2</sub> <sup><i>b</i></sup> (all data) | 0.1418                                                                                            |

<sup>*a*</sup>  $R_1 = \Sigma ||F_o| - |F_c|| / \Sigma |F_o|$ . <sup>*b*</sup>  $wR_2 = \{[\Sigma w(F_o^2 - F_c^2)^2] / [\Sigma w(F_o^2)^2]\}^{1/2}$ .

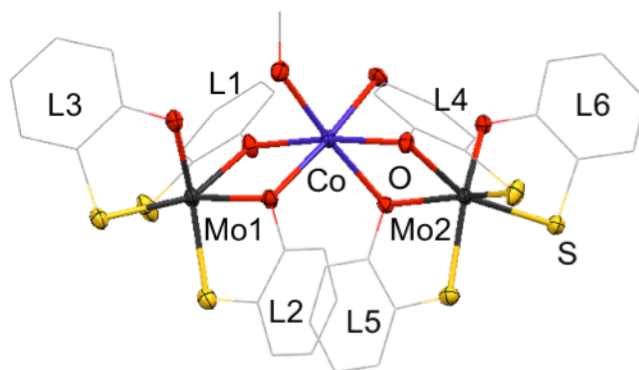

**Figure 1S.** Asymmetric unit of **4**·1.5CH<sub>2</sub>Cl<sub>2</sub> with thermal ellipsoid plots for Mo (black), O (red), S (yellow), and Co (blue) (50% probability). Hydrogen atoms and solvent molecules are omitted, and carbon atoms are depicted as wireframe for clarity.

The complex **4**·1.5CH<sub>2</sub>Cl<sub>2</sub> is isomorphous with the **3**·1.5CH<sub>2</sub>Cl<sub>2</sub>.

**Chart 1S.** Definitions of OCT/TP(%) criteria.

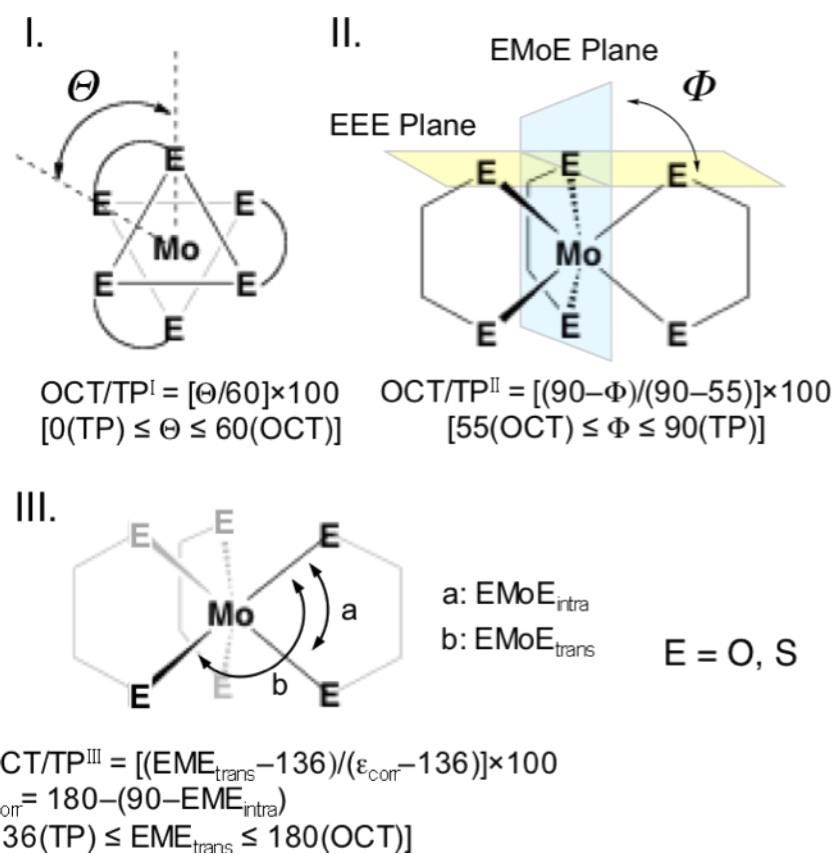

**Table 2S.** Geometrical parameters for **1-5**.

|                                              |     | OCT/TP <sup>I</sup> | OCT/TP <sup>II</sup> | OCT/TP <sup>III</sup> |
|----------------------------------------------|-----|---------------------|----------------------|-----------------------|
| <b>1</b>                                     |     | 43.4                | 45.3                 | 50.7                  |
| <b>2</b>                                     |     | 50.5                | 54.0                 | 49.5                  |
| <b>3</b> ·1.5CH <sub>2</sub> Cl <sub>2</sub> | Mo1 | 38.2                | 39.6                 | 45.0                  |
|                                              | Mo2 | 44.6                | 46.7                 | 51.6                  |
| <b>4</b> ·1.5CH <sub>2</sub> Cl <sub>2</sub> | Mo1 | 36.4                | 37.7                 | 41.3                  |
|                                              | Mo2 | 43.5                | 45.3                 | 50.1                  |
| <b>5</b>                                     |     | 63.5                | 68.8                 | 76.2                  |

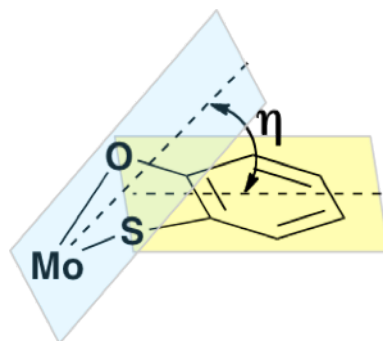

**Table 3S.** Bending angles ( $\eta$ ) in  $\text{mp}^{2-}$  of **1-5**.

|         | $\eta / ^\circ$ |          |                                              |                                              |          |
|---------|-----------------|----------|----------------------------------------------|----------------------------------------------|----------|
|         | <b>1</b>        | <b>2</b> | <b>3</b> ·1.5CH <sub>2</sub> Cl <sub>2</sub> | <b>4</b> ·1.5CH <sub>2</sub> Cl <sub>2</sub> | <b>5</b> |
| L1      | 9.27*           | 7.60     | 4.48*                                        | 4.43*                                        | 11.32*   |
| L2      | 9.27*           | 6.60     | 18.92*                                       | 20.55*                                       | 9.26*    |
| L3      | 9.27*           | 18.0     | 10.99                                        | 10.60                                        | 3.35*    |
| L4      |                 |          | 3.19*                                        | 2.81*                                        |          |
| L5      |                 |          | 16.57*                                       | 18.34*                                       |          |
| L6      |                 |          | 9.58                                         | 9.47                                         |          |
| Average | 9.27            | 10.73    | 10.62                                        | 11.03                                        | 7.98     |

\* Ligands directly attached to Na (**1**), Mn (**3**·1.5CH<sub>2</sub>Cl<sub>2</sub>), Co (**4**·1.5CH<sub>2</sub>Cl<sub>2</sub>), or Cu (**5**) atoms.

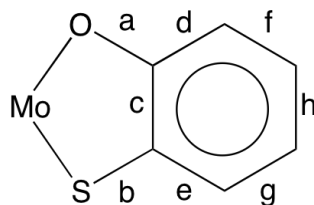

**Table 4S.** Bond distances (Å) of the  $mp^{2-}$  in **1-5**.

|                                          |     | Å        |          |          |          |          |          |           |           |
|------------------------------------------|-----|----------|----------|----------|----------|----------|----------|-----------|-----------|
|                                          |     | a        | b        | c        | d        | e        | f        | g         | h         |
| <b>1</b>                                 | L1* | 1.361(4) | 1.749(4) | 1.375(6) | 1.396(6) | 1.429(5) | 1.406(6) | 1.384(8)  | 1.402(8)  |
| <b>2</b>                                 | L1  | 1.336(3) | 1.746(3) | 1.399(4) | 1.393(4) | 1.400(4) | 1.384(5) | 1.377(5)  | 1.387(6)  |
|                                          | L2  | 1.337(3) | 1.748(3) | 1.394(4) | 1.399(4) | 1.387(4) | 1.378(5) | 1.385(5)  | 1.382(6)  |
|                                          | L3  | 1.343(3) | 1.751(3) | 1.393(4) | 1.397(4) | 1.395(4) | 1.378(4) | 1.388(4)  | 1.385(5)  |
|                                          | Av. | 1.339(3) | 1.748(3) | 1.395(4) | 1.396(4) | 1.394(4) | 1.380(5) | 1.383(5)  | 1.385(6)  |
| <b>3·1.5CH<sub>2</sub>Cl<sub>2</sub></b> | L1* | 1.367(7) | 1.748(6) | 1.395(7) | 1.386(8) | 1.397(9) | 1.391(9) | 1.374(9)  | 1.390(8)  |
|                                          | L2* | 1.374(6) | 1.751(5) | 1.396(6) | 1.395(8) | 1.400(7) | 1.378(8) | 1.373(9)  | 1.386(7)  |
|                                          | L3  | 1.347(7) | 1.749(5) | 1.406(7) | 1.396(7) | 1.393(9) | 1.395(9) | 1.387(7)  | 1.390(8)  |
|                                          | L4* | 1.363(6) | 1.755(6) | 1.409(8) | 1.390(8) | 1.399(9) | 1.386(8) | 1.381(10) | 1.389(10) |
|                                          | L5* | 1.374(5) | 1.740(5) | 1.405(7) | 1.377(7) | 1.406(6) | 1.387(6) | 1.367(9)  | 1.394(8)  |
|                                          | L6  | 1.344(7) | 1.740(5) | 1.401(7) | 1.389(7) | 1.406(8) | 1.380(9) | 1.380(8)  | 1.396(8)  |
|                                          | Av. | 1.362(6) | 1.747(5) | 1.402(7) | 1.389(8) | 1.400(8) | 1.386(8) | 1.378(9)  | 1.391(8)  |
| <b>4·1.5CH<sub>2</sub>Cl<sub>2</sub></b> | L1* | 1.361(7) | 1.755(6) | 1.401(6) | 1.393(8) | 1.388(8) | 1.400(8) | 1.370(8)  | 1.388(7)  |
|                                          | L2* | 1.375(6) | 1.749(5) | 1.386(6) | 1.395(7) | 1.397(7) | 1.376(8) | 1.377(8)  | 1.396(7)  |
|                                          | L3  | 1.341(7) | 1.748(5) | 1.419(6) | 1.387(7) | 1.395(8) | 1.390(9) | 1.388(7)  | 1.388(7)  |
|                                          | L4* | 1.364(6) | 1.750(6) | 1.397(7) | 1.382(7) | 1.411(8) | 1.384(8) | 1.372(9)  | 1.388(9)  |
|                                          | L5* | 1.363(4) | 1.746(5) | 1.411(7) | 1.386(7) | 1.389(6) | 1.379(6) | 1.396(8)  | 1.396(8)  |
|                                          | L6  | 1.360(7) | 1.752(5) | 1.376(7) | 1.398(7) | 1.401(8) | 1.375(8) | 1.371(8)  | 1.398(8)  |
|                                          | Av. | 1.361(6) | 1.750(5) | 1.398(7) | 1.390(7) | 1.397(8) | 1.384(8) | 1.379(8)  | 1.392(8)  |
| <b>5</b>                                 | L1* | 1.352(6) | 1.765(5) | 1.395(7) | 1.402(7) | 1.386(7) | 1.381(8) | 1.383(8)  | 1.387(9)  |
|                                          | L2* | 1.338(5) | 1.754(5) | 1.413(7) | 1.400(7) | 1.393(7) | 1.396(8) | 1.378(8)  | 1.363(9)  |
|                                          | L3* | 1.349(5) | 1.748(4) | 1.396(7) | 1.382(6) | 1.402(7) | 1.382(7) | 1.396(7)  | 1.379(8)  |
|                                          | Av. | 1.346(5) | 1.756(5) | 1.401(7) | 1.395(7) | 1.394(7) | 1.386(8) | 1.386(8)  | 1.376(9)  |

\* Ligands directly attached to Na (**1**), Mn (**3·1.5CH<sub>2</sub>Cl<sub>2</sub>**), Co (**4·1.5CH<sub>2</sub>Cl<sub>2</sub>**), or Cu (**5**) atoms.

**Table 5S.** Selected bond distances (Å) for **4**·1.5CH<sub>2</sub>Cl<sub>2</sub>.

|                 | <b>4</b> ·1.5CH <sub>2</sub> Cl <sub>2</sub> |
|-----------------|----------------------------------------------|
| Mo(1)-O(1) [L1] | 2.065(4)*                                    |
| Mo(1)-O(2) [L2] | 2.072(3)*                                    |
| Mo(1)-O(3) [L3] | 2.021(3)                                     |
| Mo(2)-O(4) [L4] | 2.063(3)*                                    |
| Mo(2)-O(5) [L5] | 2.068(3)*                                    |
| Mo(2)-O(6) [L6] | 2.017(3)                                     |
| Mo(1)-S(1) [L1] | 2.3224(15)                                   |
| Mo(1)-S(2) [L2] | 2.3190(12)                                   |
| Mo(1)-S(3) [L3] | 2.3490(15)                                   |
| Mo(2)-S(4) [L4] | 2.3297(14)                                   |
| Mo(2)-S(5) [L5] | 2.3033(12)                                   |
| Mo(2)-S(6) [L6] | 2.3559(15)                                   |

\* Distances between the Mo and chalcogen atoms directly attached to Co<sup>II</sup> atom.

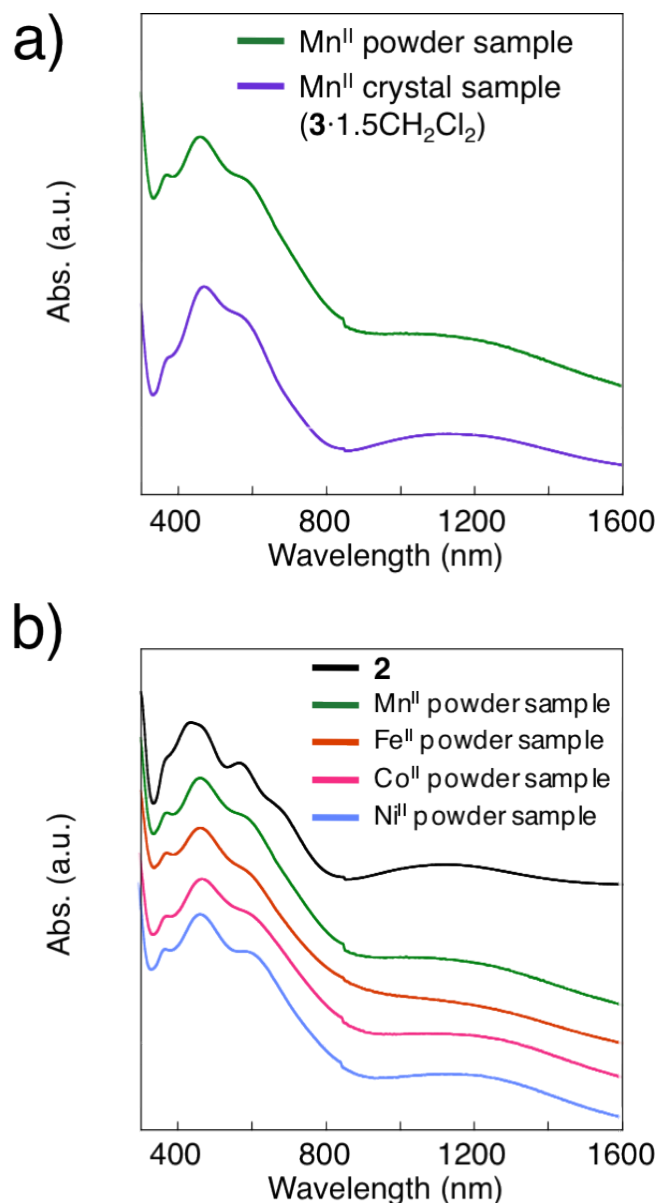

**Figure 2S.** (a) UV-Vis-NIR spectra of Mn<sup>II</sup> powder sample (green line) and Mn<sup>II</sup> crystal sample (purple line), and (b) **2** (black line), Mn<sup>II</sup> powder sample (green line), Fe<sup>II</sup> powder sample (orange line), Co<sup>II</sup> powder sample (pink line), and Ni<sup>II</sup> powder sample (right blue line) in the solid states using KBr pellets.

The characteristic absorption maxima around 390, 470, 590 nm are commonly observed for Mn<sup>II</sup>-crystal sample (3·1.5CH<sub>2</sub>Cl<sub>2</sub>) and powder samples of Mn<sup>II</sup>, Fe<sup>II</sup>, Co<sup>II</sup>, and Ni<sup>II</sup>, and these spectral features indicate that these divalent metal cations interact with metalloligand [Mo<sup>V</sup>(mp)<sub>3</sub>]<sup>−</sup> by similar manner.

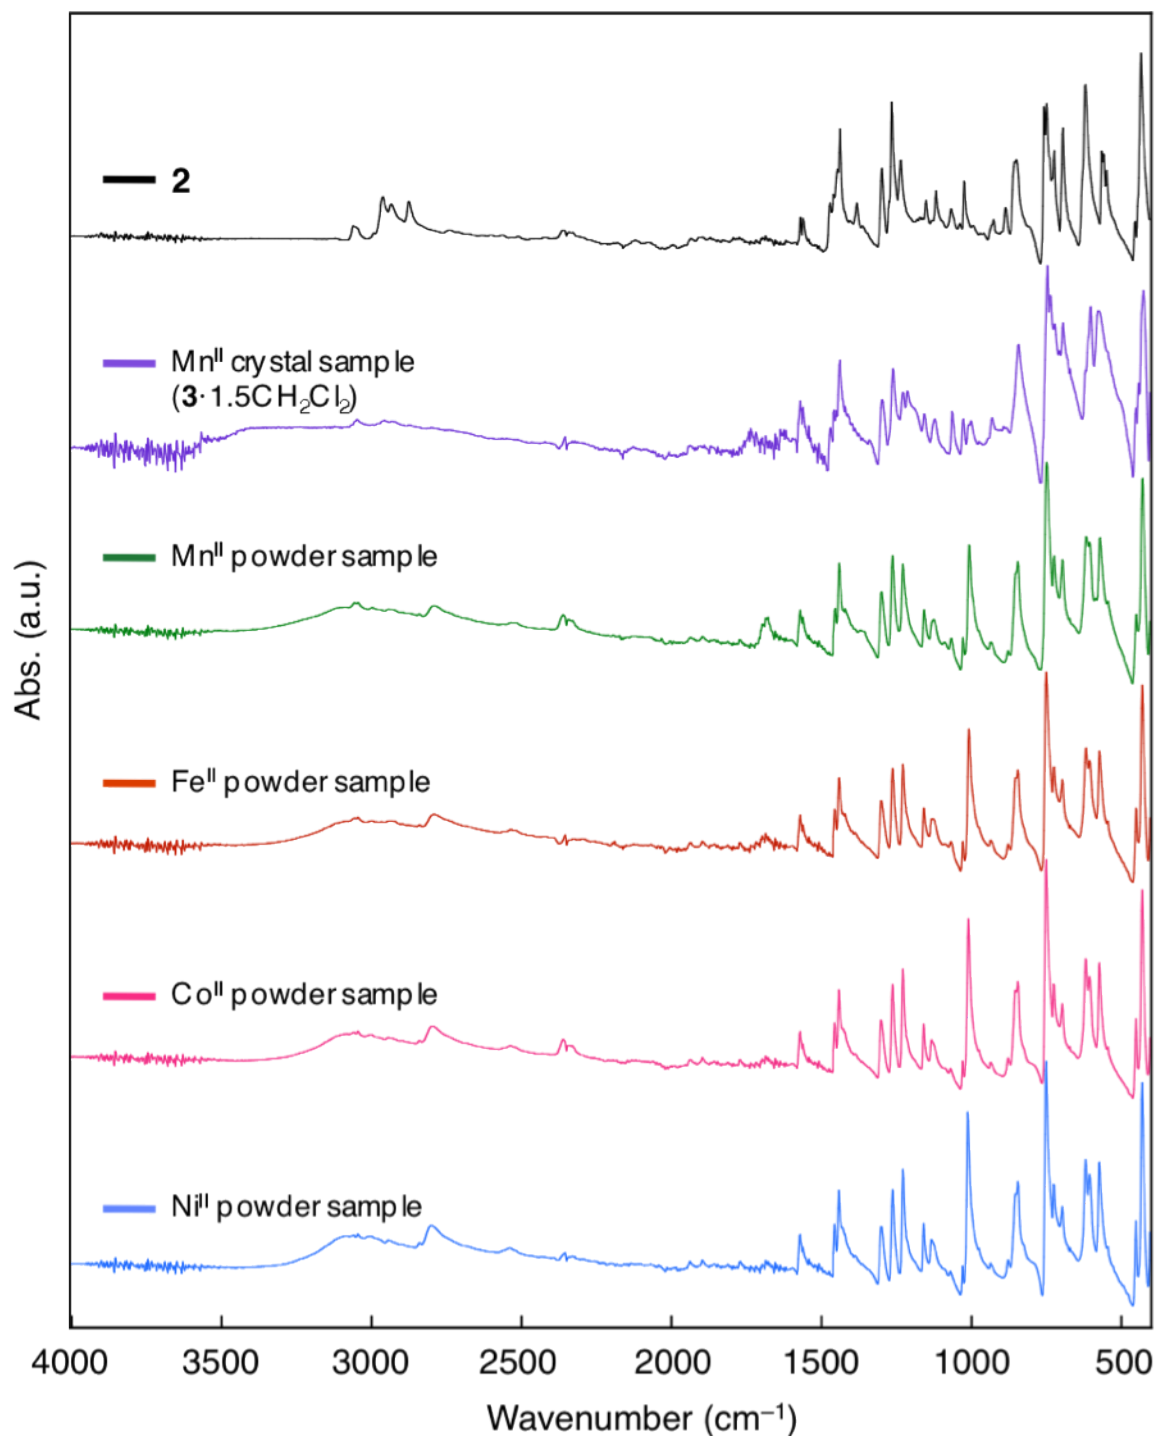

**Figure 3S.** IR spectra of **2** (black line), Mn<sup>II</sup> crystal sample (**3**·1.5CH<sub>2</sub>Cl<sub>2</sub>) (purple line), Mn<sup>II</sup> powder sample (green line), Fe<sup>II</sup> powder sample (orange line), Co<sup>II</sup> powder sample (pink line), and Ni<sup>II</sup> powder sample (right blue line) in the solid states.

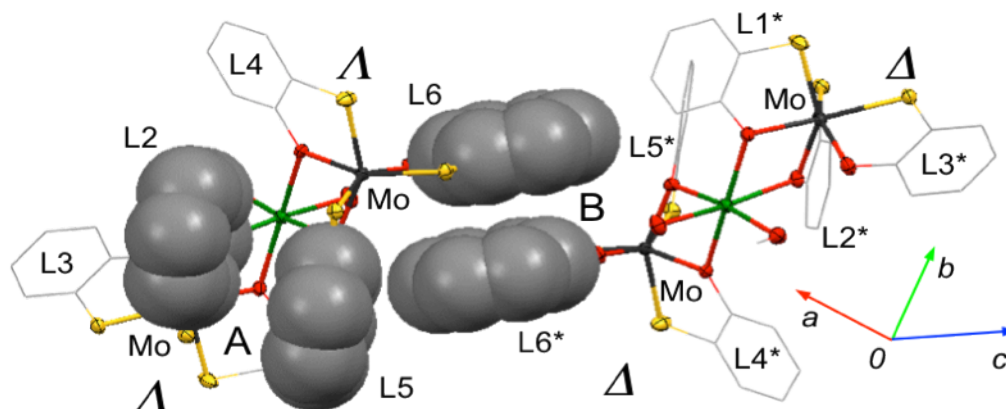

**Figure 4S.** Intramolecular (A) and intermolecular  $\pi$ - $\pi$  interaction (B) in  $3 \cdot 1.5\text{CH}_2\text{Cl}_2$ .  $\text{CH}_2\text{Cl}_2$  molecules are omitted for clarity. The  $\text{mp}^{2-}$  rings (L2, L5, and L6) involved with  $\pi$ - $\pi$  interactions are drawn as space-filling model.

In the cases of  $3 \cdot 1.5\text{CH}_2\text{Cl}_2$ ,  $\Delta\Lambda$ -chirality around the pseudo-octahedral  $\text{Mo}^{\text{V}}$  centers is unified in trinuclear units (Figure 3S). The intramolecular  $\pi$ - $\pi$  interaction with the shortest carbon atom distances among the aromatic rings are 3.450 Å (denoted as A) is found between neighboring *fac*- $[\text{Mo}(\text{mp})_3]^-$  units through L2 and L5, both of which are involved in coordination to additional metal ( $\text{Mn}^{\text{II}}$ ). Furthermore, the optically isomeric trinuclear units are alternately stacked between layers through intermolecular  $\pi$ - $\pi$  interaction between L6 and L6\* (denoted as B), which are free from additional metal binding, with the closest carbon atom distances 3.480 Å. Since the other  $\text{mp}^{2-}$  rings such as L1, L3, and L4 are not related with any intermolecular interaction, it is finally revealed that dimeric structures of trinuclear units through intermolecular  $\pi$ - $\pi$  interaction are formed in crystals of  $3 \cdot 1.5\text{CH}_2\text{Cl}_2$ .

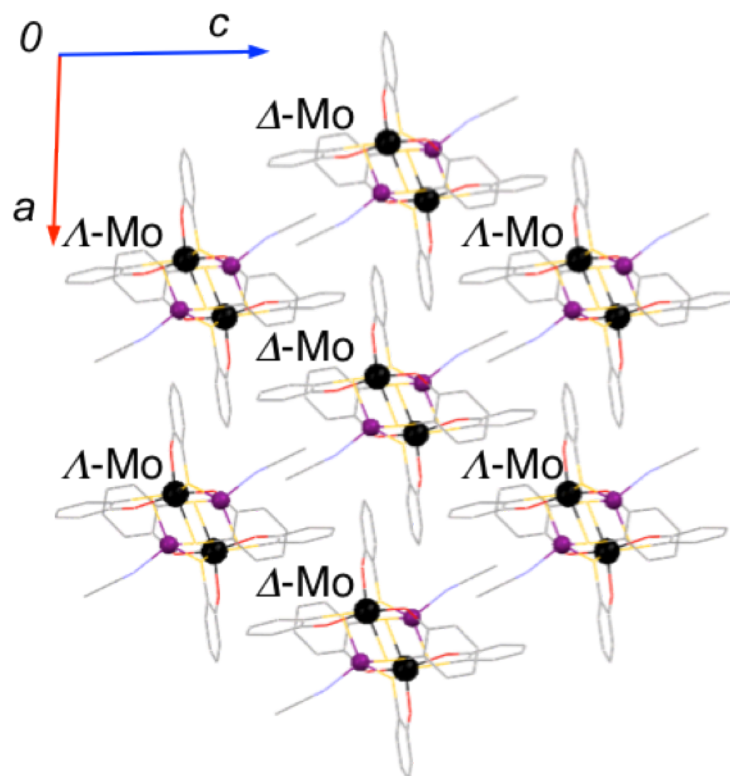

**Figure 5S.** Crystal packing of **5** projected along with the *b*-axis. The Mo and Cu atoms are drawn as ball and stick models, and, C, N, O, and S atoms are depicted as wireframe for clarity, with omission of hydrogen atoms.

**Table 6S.** UV-Vis-NIR spectroscopic data of **1-3**, and **5** in solution and in the solid states.

| Complex              | Condition                                               | $\lambda$ , nm ( $\epsilon$ , M <sup>-1</sup> cm <sup>-1</sup> ) |            |                          |                          |                         |            |
|----------------------|---------------------------------------------------------|------------------------------------------------------------------|------------|--------------------------|--------------------------|-------------------------|------------|
|                      |                                                         |                                                                  |            |                          |                          |                         |            |
| <b>1<sup>a</sup></b> | Solid                                                   | 370 <sup>sh</sup>                                                | 455        | 565                      | 1186                     |                         |            |
| <b>2<sup>a</sup></b> | Solid                                                   | 370 <sup>sh</sup>                                                | 421        | 494 <sup>sh</sup>        | 590                      | 680 <sup>sh</sup>       | 1150       |
| <b>3<sup>a</sup></b> | Solid                                                   | 370 <sup>sh</sup>                                                | 470        | 590 <sup>sh</sup>        | 730 <sup>sh</sup>        | 1152                    |            |
| <b>5<sup>a</sup></b> | Solid                                                   | 390 <sup>sh</sup>                                                | 440        | 520                      | 690 <sup>sh</sup>        | 840 <sup>sh</sup>       |            |
| <b>1</b>             | CH <sub>3</sub> CN                                      | 360(10800)                                                       | 419(12500) | 465(11000) <sup>sh</sup> | 562(6960) <sup>sh</sup>  | 667(3590) <sup>sh</sup> | 1052(790)  |
|                      | <i>o</i> -Cl <sub>2</sub> C <sub>6</sub> H <sub>4</sub> | 370(11800)                                                       | 444(15900) | 568 (9840) <sup>sh</sup> | 986(1860)                |                         |            |
| <b>2</b>             | CH <sub>3</sub> CN                                      | 362(10900)                                                       | 418(12600) | 472(10800) <sup>sh</sup> | 560(7090) <sup>sh</sup>  | 667(3640) <sup>sh</sup> | 1052(790)  |
|                      | <i>o</i> -Cl <sub>2</sub> C <sub>6</sub> H <sub>4</sub> | 367(12200)                                                       | 420(14000) | 470(11600) <sup>sh</sup> | 562(7740)                | 667(3940) <sup>sh</sup> | 1020(930)  |
| <b>3</b>             | CH <sub>3</sub> CN                                      | 362(21500) <sup>sh</sup>                                         | 418(24800) | 470(21500) <sup>sh</sup> | 562(13900) <sup>sh</sup> | 667(7120) <sup>sh</sup> | 1052(1590) |
|                      | <i>o</i> -Cl <sub>2</sub> C <sub>6</sub> H <sub>4</sub> | 365(20600) <sup>sh</sup>                                         | 454(28900) | 564(16400) <sup>sh</sup> | 690(5510) <sup>sh</sup>  | 995(3800)               |            |

<sup>a</sup> measured for KBr pellets. <sup>sh</sup> appeared as shoulder peak.

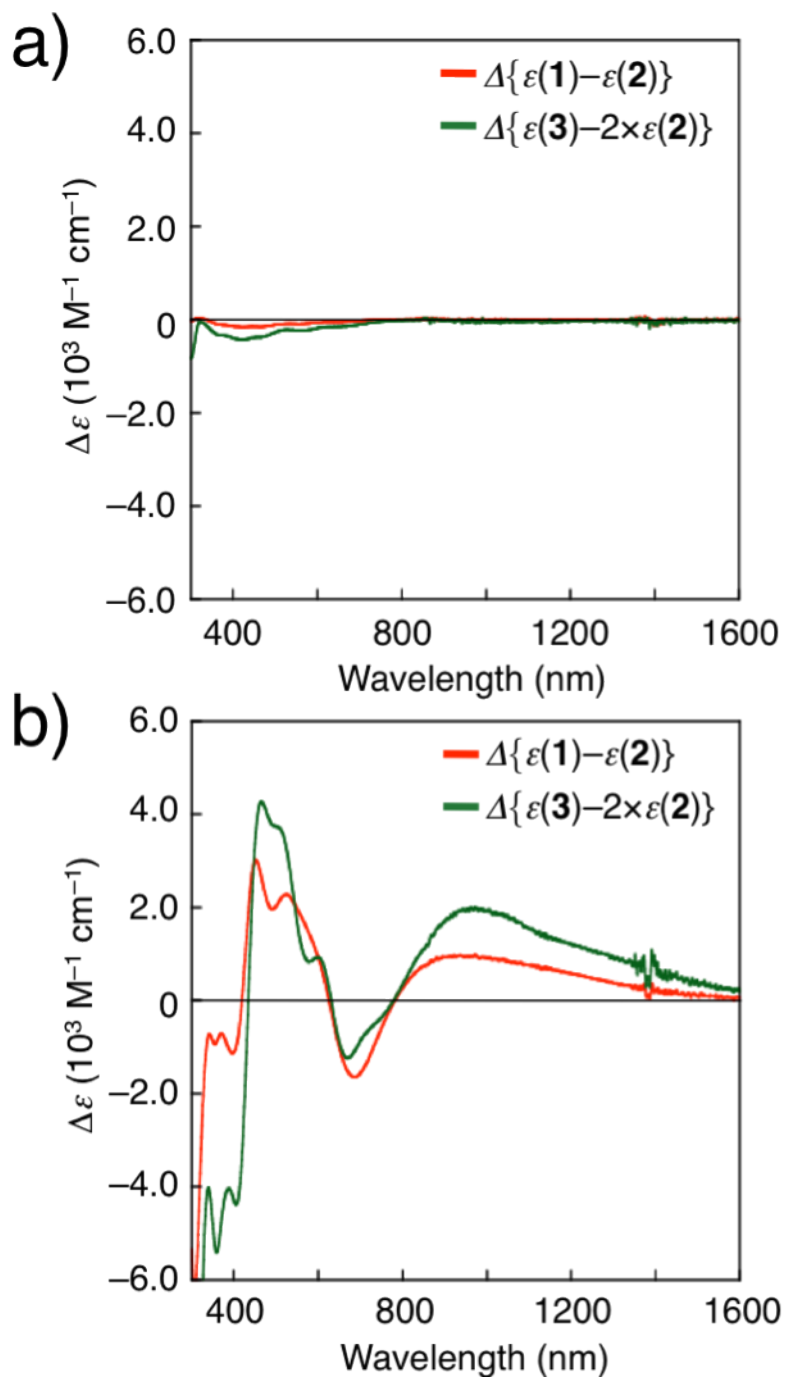

**Figure 6S.** Differential spectra of  $\Delta\{\epsilon(1)-\epsilon(2)\}$  (red line) and  $\Delta\{\epsilon(3)-2\times\epsilon(2)\}$  (green line) in (a)  $\text{CH}_3\text{CN}$  and (b)  $o\text{-Cl}_2\text{C}_6\text{H}_4$  solution at  $3 \times 10^{-4} \text{ M}$  at room temperature.

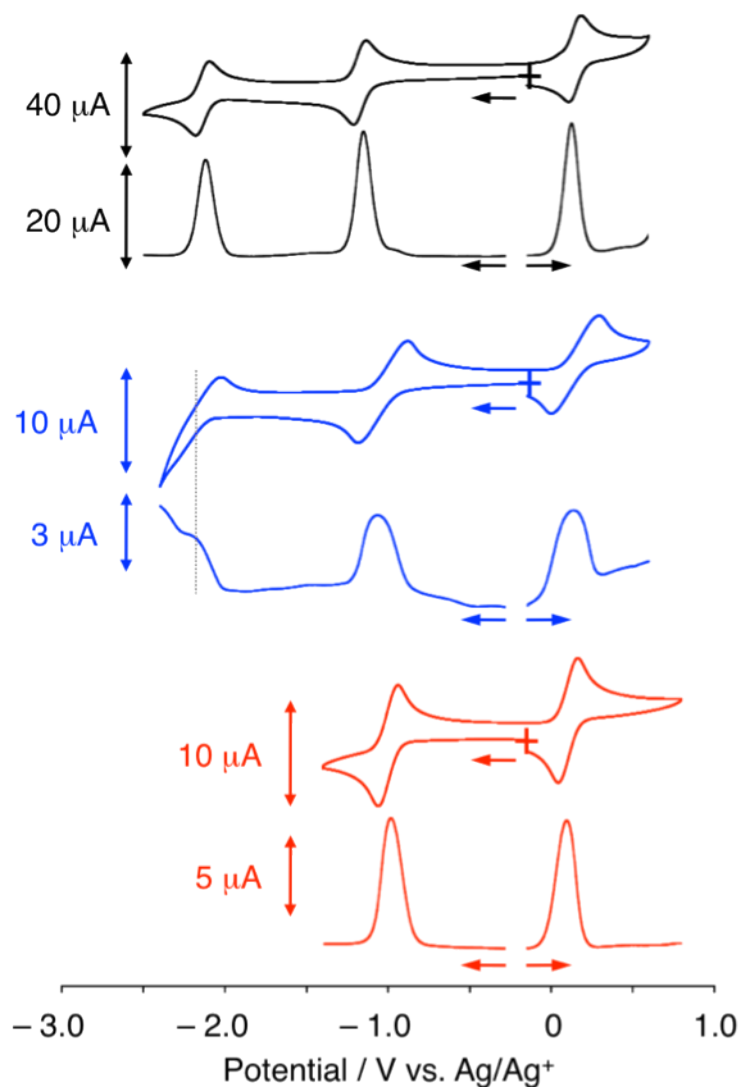

**Figure 7S.** CVs and DPVs of **2** (1 × 10<sup>-3</sup> M) in CH<sub>3</sub>CN with 0.05 M TBAP (black line), *o*-Cl<sub>2</sub>C<sub>6</sub>H<sub>4</sub> with 0.05 M TBAP (blue line), and *o*-Cl<sub>2</sub>C<sub>6</sub>H<sub>4</sub> with 0.05 M TBAFB (red line).

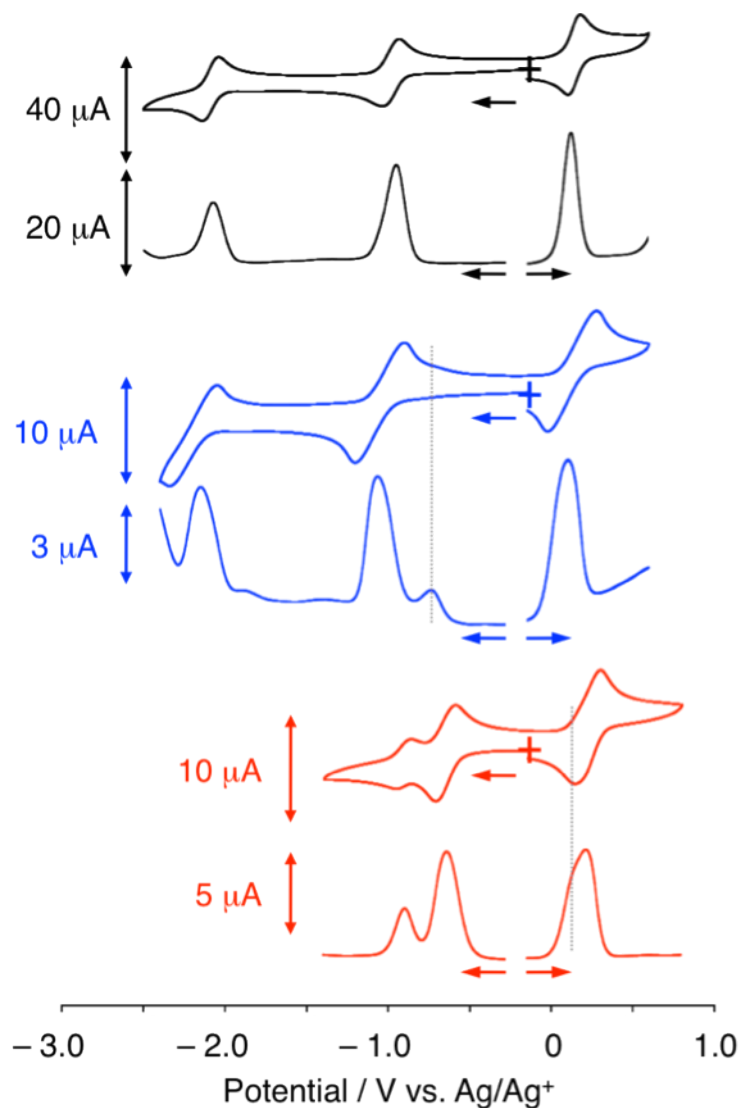

**Figure 8S.** CVs and DPVs of **1** ( $1 \times 10^{-3}$  M) in  $\text{CH}_3\text{CN}$  with 0.05 M TBAP (black line),  $o\text{-Cl}_2\text{C}_6\text{H}_4$  with 0.05 M TBAP (blue line), and  $o\text{-Cl}_2\text{C}_6\text{H}_4$  with 0.05 M TBAFB (red line). For  $o\text{-Cl}_2\text{C}_6\text{H}_4$  with TBAFB, negative region than  $-1.4$  V could not be investigated due to its potential window.

The redox wave of **1** around  $-0.74$  V indicates slight existence of assembly keeping associative interaction between the metalloligand and  $\text{Na}^+$ .

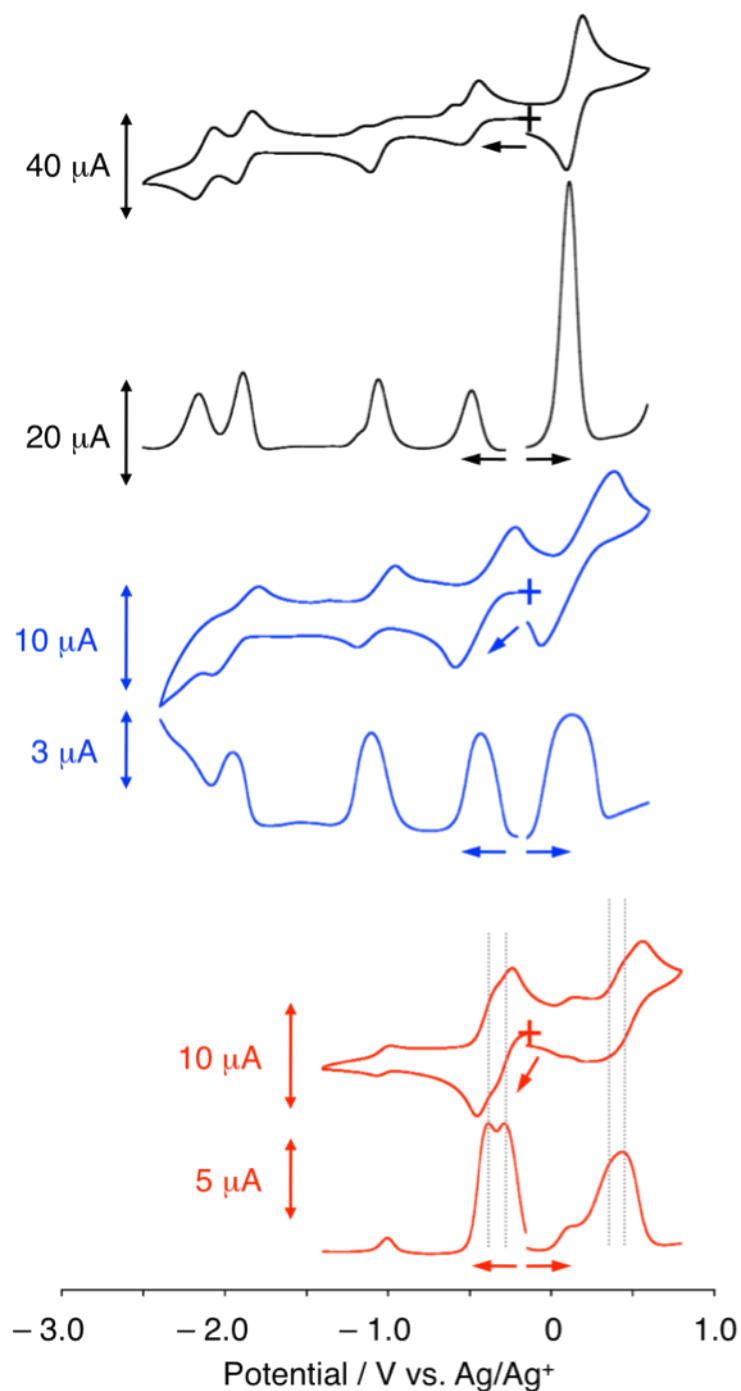

**Figure 9S.** CVs and DPVs of **3** ( $1 \times 10^{-3}$  M) in CH<sub>3</sub>CN with 0.05 M TBAP (black line), *o*-Cl<sub>2</sub>C<sub>6</sub>H<sub>4</sub> with 0.05 M TBAP (blue line), and *o*-Cl<sub>2</sub>C<sub>6</sub>H<sub>4</sub> with 0.05 M TBAFB (red line). For *o*-Cl<sub>2</sub>C<sub>6</sub>H<sub>4</sub> with TBAFB, negative region than -1.4 V could not be investigated due to its potential window.

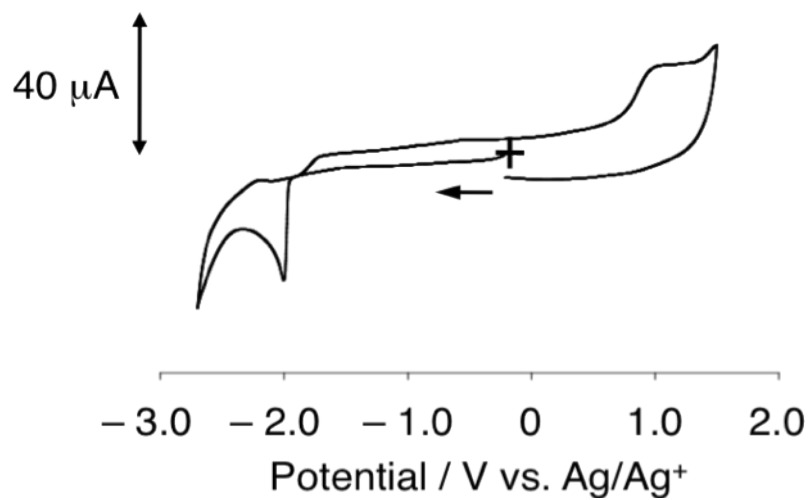

**Figure 10S.** CV of  $\text{Mn}^{\text{II}}(\text{H}_2\text{O})_6(\text{ClO}_4)_2$  ( $1 \times 10^{-3}$  M) in  $\text{CH}_3\text{CN}$  with 0.1 M  $\text{TBAPF}_6$ .

**Scheme 1S.** Plausible mechanisms of electrochemically irreversible reactions of **3** in CH<sub>3</sub>CN solution.<sup>1</sup>

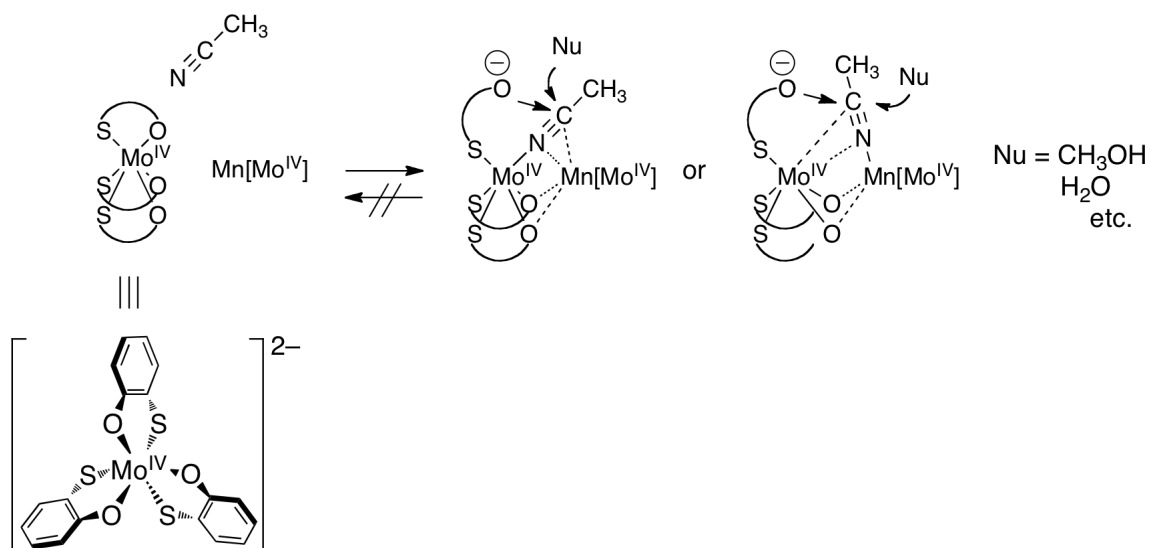

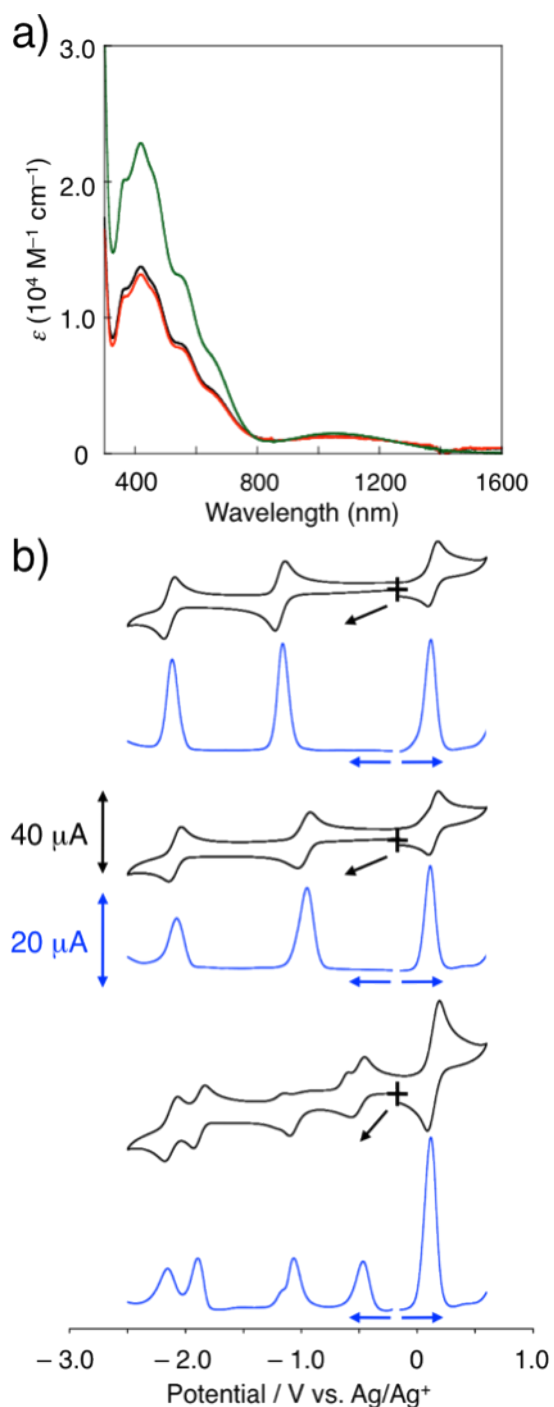

**Figure 11S.** (a) UV-Vis-NIR spectra of **1** (red line), **2** (black line), and **3** (green line) ( $3 \times 10^{-4} \text{ M}$ ) in  $\text{CH}_3\text{CN}$  solution containing  $1.5 \times 10^{-2} \text{ M}$  TBAFB. (b) CVs (black line) and DPVs (blue line) of **2** (top), **1** (middle), and **3** (bottom) ( $1 \times 10^{-3} \text{ M}$ ) in  $\text{CH}_3\text{CN}$  solution containing 0.05 M TBAFB.

**Table 7S.** Redox potentials of **1**, **2**, and **3** in CH<sub>3</sub>CN containing TBAFB.

| Complex  | vs. Ag/Ag <sup>+</sup>   |                          |                         |
|----------|--------------------------|--------------------------|-------------------------|
|          | $E_{1/2}^{2\text{ Red}}$ | $E_{1/2}^{1\text{ Red}}$ | $E_{1/2}^{1\text{ Ox}}$ |
| <b>1</b> | −2.09                    | −0.98                    | 0.14                    |
| <b>2</b> | −2.14                    | −1.18                    | 0.14                    |
| <b>3</b> | −1.14 <sup>irr</sup>     | −0.52                    | 0.14                    |

<sup>irr</sup> Irreversible; the recorded potentials are cathodic potentials at a scan rate of 50 mV/s.

## References

1. (a) R. A. Michelin, M. Mozzon and R. Bertani, *Coord. Chem. Rev.*, 1996, **147**, 299-338; (b) V. Y. Kukushkin and A. J. L. Pombeiro, *Chem. Rev.*, 2002, **102**, 1771-1802.
